# Supplementary material
Source: Springer Nature journal article supplement (https://www.springermedizin.de/resource/supplementary/12955_2008_563_MOESM5_ESM.pdf/9560716)

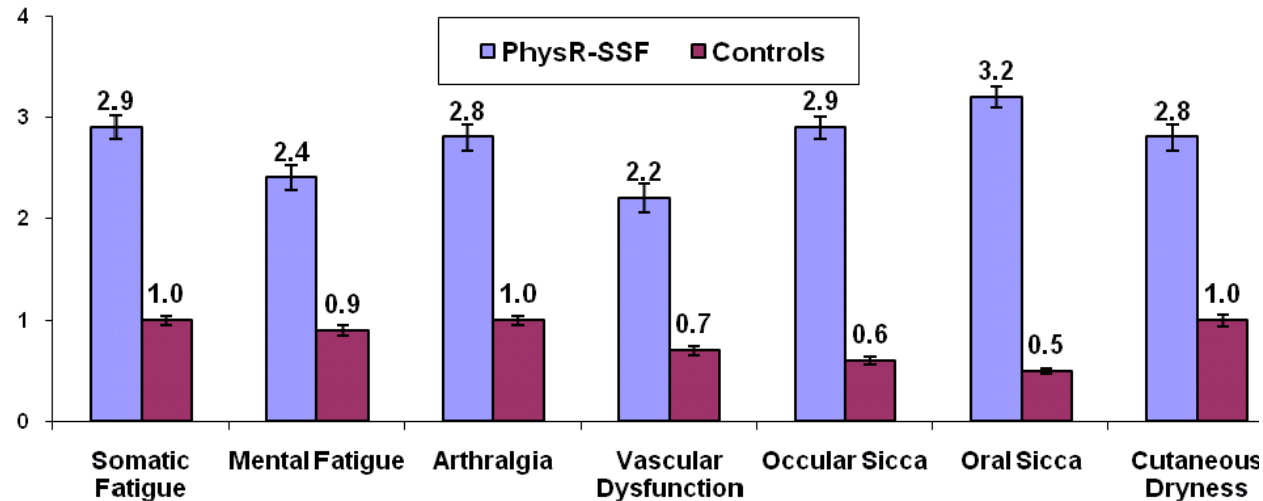

*Note: Mean scores and Standard Errors for PROFAD-SSI domains*

Supplement: MOESM5 [file 9560716]
